# Supplementary material for: Enhancing protective microglial activities with a dual function TREM2 antibody to the stalk region
Source: PubMed Central journal article supplement (PMC7136959; doi:10.15252/emmm.201911227), 2020-03-10
Supplement: EMMM-12-e11227-s001.pdf [file EMMM-12-e11227-s001.pdf]

**Table EV 1: Antibodies for immunoblotting**

For immunoblot detection, the following antibodies were used:

| Antigen                    | Clonality  | Species | Clone ID and/or product # | SDS-Gel type             | 1° antibody dilution | Source      | Reference                           |
|----------------------------|------------|---------|---------------------------|--------------------------|----------------------|-------------|-------------------------------------|
| Mouse TREM2 N-term         | Monoclonal | Rat     | 5F4                       | 12% and 10% Tris-Glycine | varying              | Feederle    | Xiang et al. EMBO Mol Med 2016      |
| Residues 66-81 of APP      | Monoclonal | Mouse   | 22C11, MAB348             | 12% Tris-Glycine         | 1:1000               | Merck       | -                                   |
| Calnexin C-term            | Polyclonal | Rabbit  | SPA-860                   | 12% Tris-Glycine         | 1:5000               | Enzo        | -                                   |
| Residues 1-16 of A $\beta$ | Monoclonal | Rat     | 2D8                       | 12% and 10% Tris-Glycine | 1:100                |             | Shirotani et al. Neurobiol Dis 2007 |
| Human TREM2 N-term         | Polyclonal | Goat    | AF1828                    | 12% Tris-Glycine         | 1:2000               | R&D Systems | -                                   |
| Mouse TREM1 N-term         | Polyclonal | Goat    | AF1187                    | 12% Tris-Glycine         | 0.5 $\mu$ g/ml       | R&D Systems | -                                   |
| Mouse TREM2 N-term         | Monoclonal | Rat     | 4D9                       | 12% Tris-Glycine         | 0.5 $\mu$ g/ml       | Feederle    | This publication                    |

Secondary antibodies were HRP-conjugated goat anti-rat IgG (1:10,000; AP136P; Merck), HRP-conjugated goat anti-rabbit IgG (1:10,000; W401B; Promega), HRP-

conjugated goat anti-mouse IgG (1:10,000; W402B; Promega), and HRP-conjugated donkey anti-goat IgG (1:10,000; 705-035-003; Dianova).
