# Supplementary material for: Enhancing protective microglial activities with a dual function TREM2 antibody to the stalk region
Source: PubMed Central journal article supplement (PMC7136959; doi:10.15252/emmm.201911227), 2020-03-10
Supplement: EMMM-12-e11227-s002.pdf [file EMMM-12-e11227-s002.pdf]

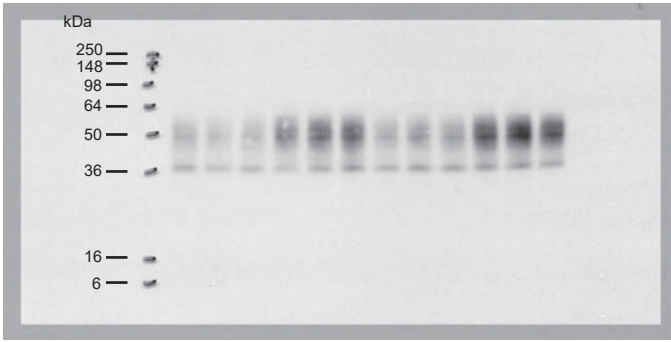

Fig. 1B; TREM2; 12 % Tris Glycine

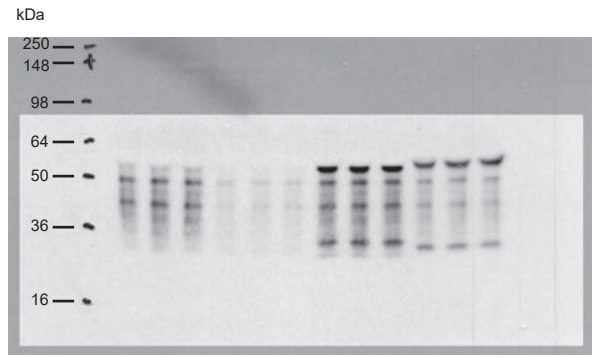

Fig. 1C; TREM2; 10 % Tris Glycine

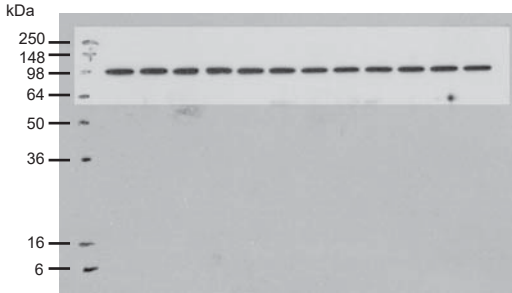

Fig. 1B; calnexin; 12 % Tris Glycine

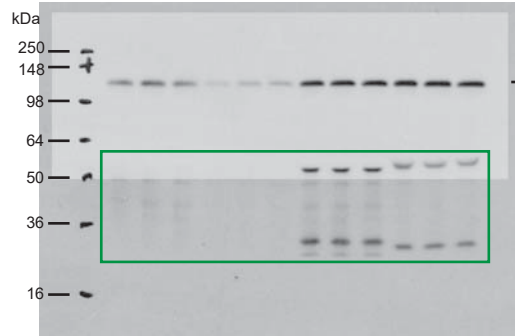

Upon probing for TREM2 the same membrane was re-probed using the anti-sAPP $\alpha$  antibody. Because of re-probing some residual TREM2 signal is detectable (green box).

Fig. 1C; sAPP $\alpha$ ; 10 % Tris Glycine

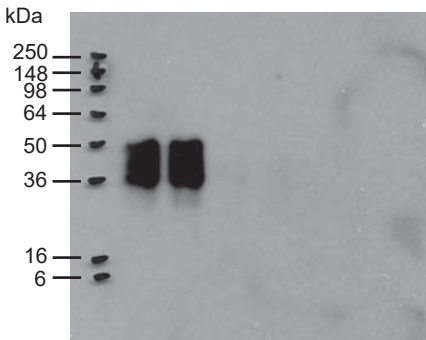

Fig. 1F  
TREM2 (human)  
12 % Tris Glycine

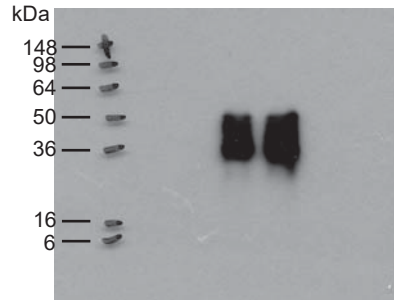

Fig. 1F  
TREM2 (mouse)  
12 % Tris Glycine

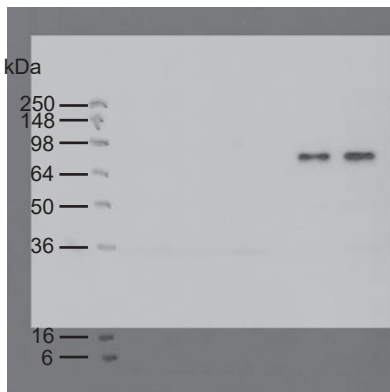

Fig. 1F  
TREM1 (mouse)  
12 % Tris Glycine
