# Supplementary material for: Enhancing protective microglial activities with a dual function TREM2 antibody to the stalk region
Source: PubMed Central journal article supplement (PMC7136959; doi:10.15252/emmm.201911227), 2020-03-10
Supplement: EMMM-12-e11227-s004.pdf [file EMMM-12-e11227-s004.pdf]

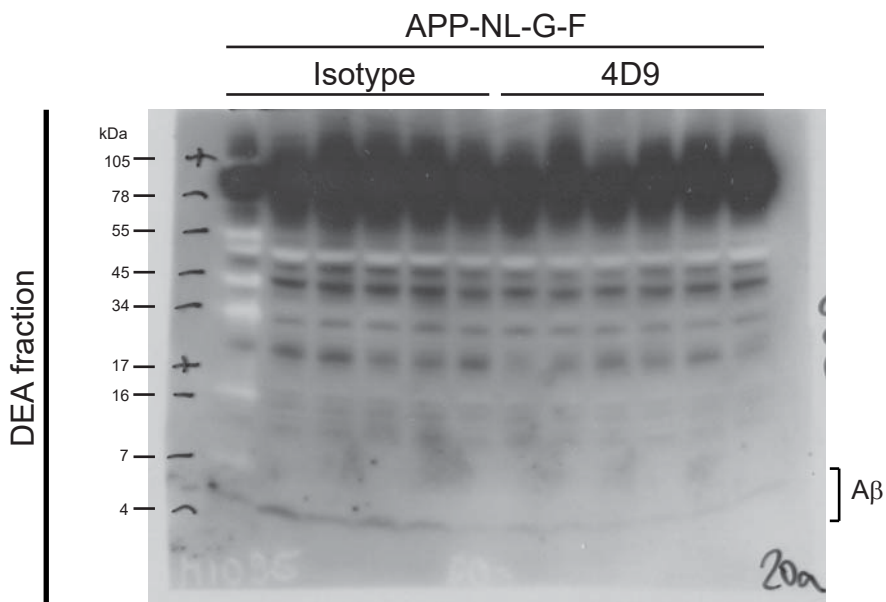

Note that the DEA membrane was exposed 50-fold longer than the FA membrane.

Fig. 7F; Aβ; 10-20 % Tris Tricine

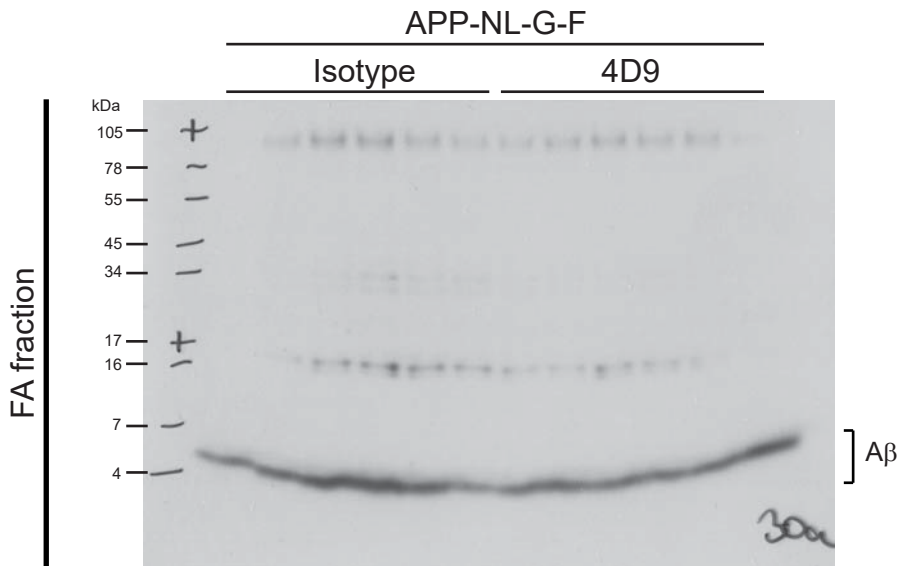

Fig. 7F; Aβ; 10-20 % Tris Tricine
